# Supplementary material
Source: PubMed Central journal article supplement (PMC4558666)
Supplement: supp_tpc.114.135335_tpc135335_Supplemental.pdf [file supp_tpc.114.135335_tpc135335_Supplemental.pdf]

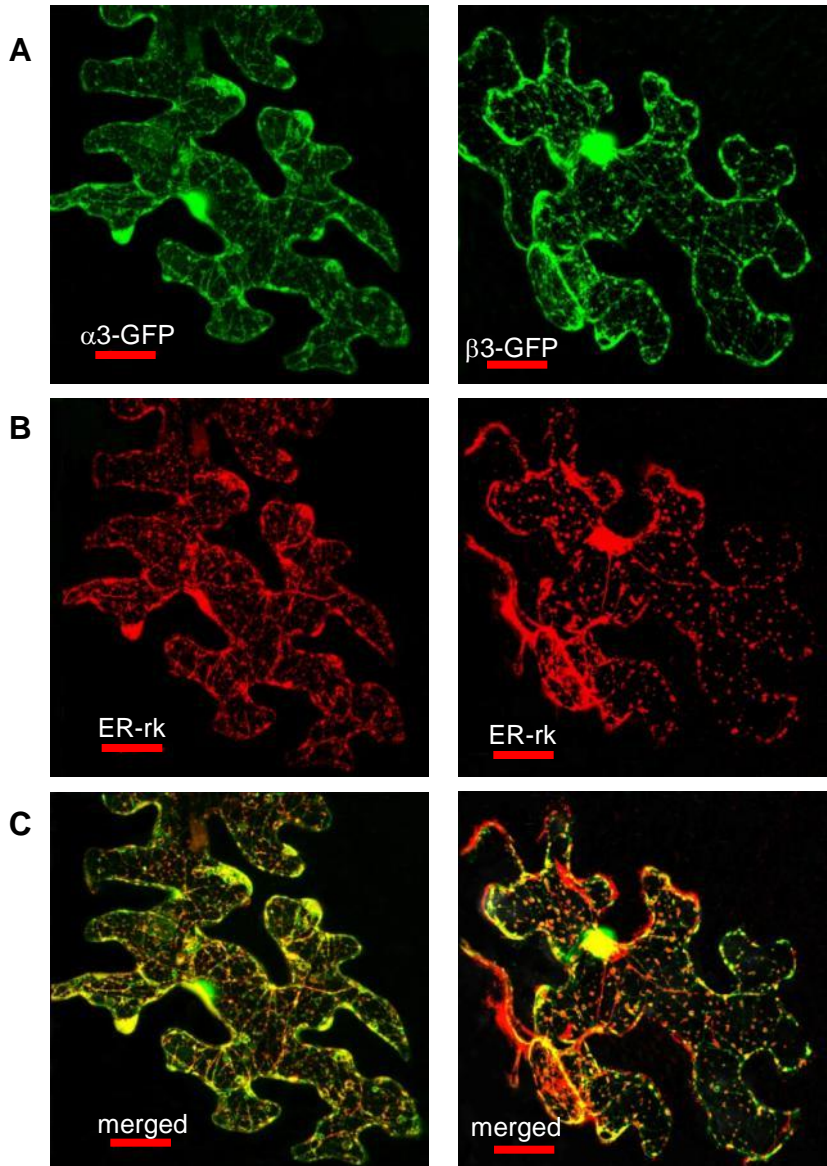

**Supplemental Figure 1. Subcellular localization of CK2 $\alpha 3/\beta 3$ .**

Colocalization of CK2 $\alpha 3/\beta 3$ -GFP (*35S- $\alpha 3/\beta 3$ -GFP*) and ER-rk in tobacco leaves. The displayed image is a maximum projected z-stack of 24 confocal sections (total z depth = 28  $\mu$ m). Bars = 20  $\mu$ m.

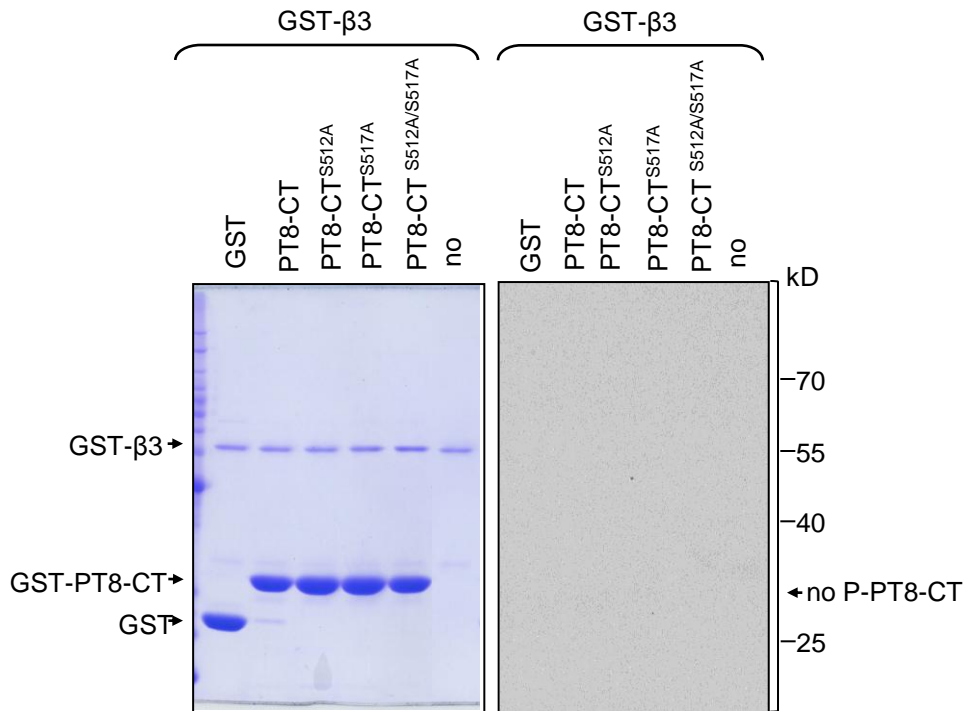

**Supplemental Figure 2. CK2β3 is unable to phosphorylate the C-terminal Ser-517 residue of PT8.** Equal amounts of GST-tagged PT8-CT and its Ser-to-Ala mutant proteins were incubated with CK2β3 in the presence of  $\gamma$ -<sup>32</sup>P-ATP. The reactions were stopped by the addition of SDS-loading buffer. After electrophoresis, proteins were visualized by Coomassie blue staining (left panel) and the phosphorylated proteins were visualized by autoradiography (right panel). Control reactions with GST as a substrate (first lane) and no substrate (last lane) were carried out side-by-side.

Supplemental Data. Chen et al. (2015). Plant Cell 10.1105/tpc.114.135335

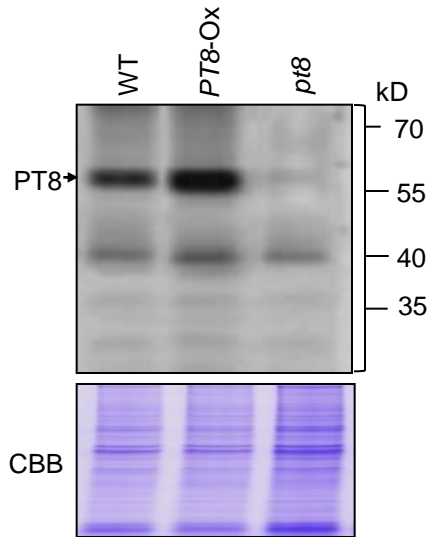

**Supplemental Figure 3. Specificity of the rice PT8 polyclonal antibody.**

Immunoblotting of plasma membrane protein from roots of the wild type (WT; NIP), plants displaying *PT8*-overexpression (*PT8-Ox*) and *pt8* mutant showed a specific band of expected size of PT8 (59.1 kDa). The immunoblots were developed with anti-PT8 in SDS-PAGE. Coomassie brilliant blue (CBB) staining was used as loading control.

Supplemental Data. Chen et al. (2015). Plant Cell 10.1105/tpc.114.135335

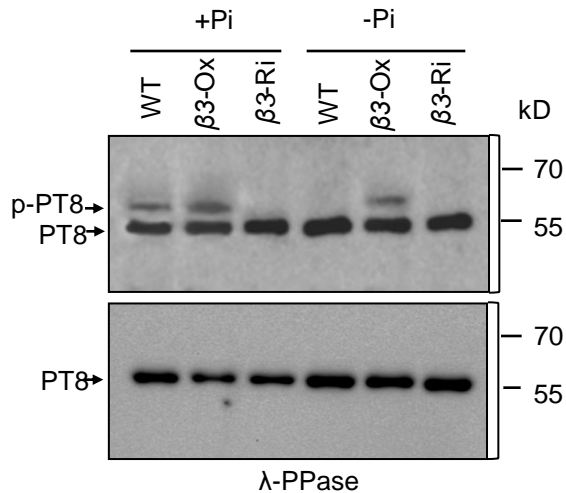

**Supplemental Figure 4. Effect of CK2 $\beta$ 3 overexpression on PT8 phosphorylation *in vivo*.** Mobility of bands was observed in the wild type (WT), CK2 $\beta$ 3-overexpression ( $\beta$ 3-Ox) and CK2 $\beta$ 3-knockdown ( $\beta$ 3-Ri) plants (upper). Sensitivity of these bands to  $\lambda$ -phosphatase treatment ( $\lambda$ -PPase; lower) was also tested. The immunoblots were developed with anti-PT8 in PhosTag SDS-PAGE, with 10  $\mu$ g protein loaded in each lane.

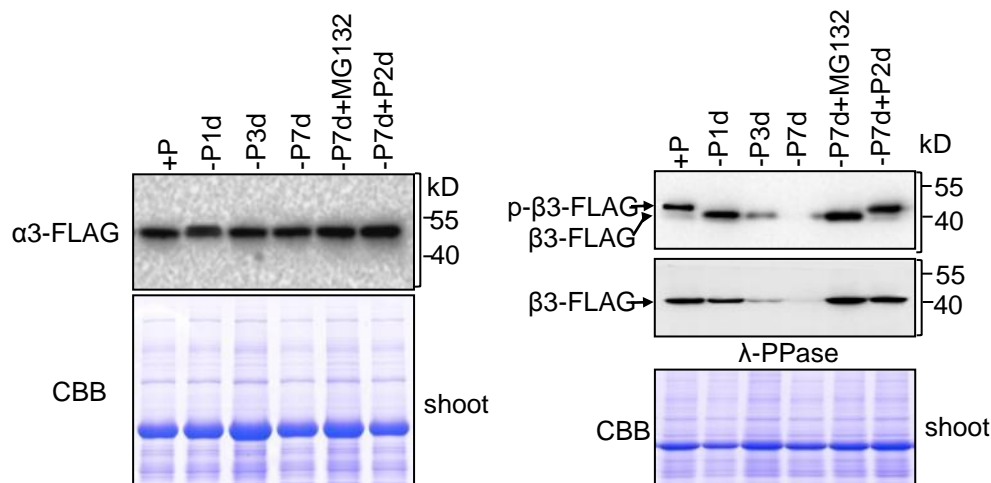

**Supplemental Figure 5. Immunoblotting analysis for CK2 $\alpha$ 3/ $\beta$ 3 protein level in plants grown under Pi-sufficient and Pi-starvation conditions.** CK2 $\alpha$ 3/ $\beta$ 3 levels in shoots. Proteins from shoots of the transgenic plants grown for 10 d and then subjected to Pi starvation for different periods as indicated, to Pi re-supply after Pi starvation, or to Pi starvation with MG132 (10  $\mu$ M) were detected by immunoblotting in Phostag SDS-PAGE using an anti-FLAG antibody. Equal amounts of protein (15  $\mu$ g) were used for immunoblotting. Coomassie brilliant blue (CBB) staining was used as loading control.

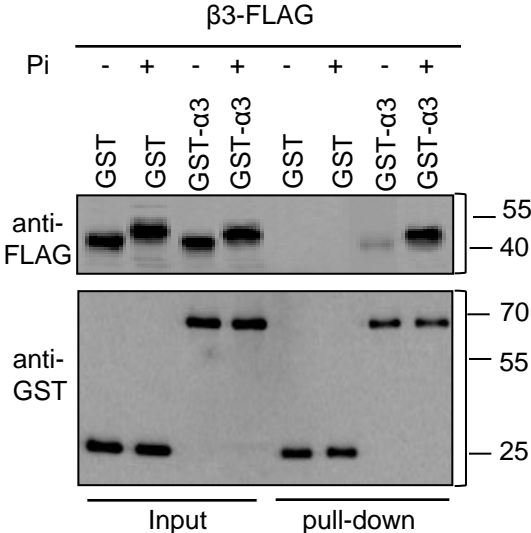

**Supplemental Figure 6. Cellular Pi sensitivity of the interaction between CK2 $\beta 3$  and CK2 $\alpha 3$ .** Equal amounts of  $\beta 3$ -FLAG (50 ng) purified from transgenic plants grown under +P or -P1d, and GST- $\alpha 3$  purified in *E. coli* were subjected to GST pull-down assays. Immunoblots were developed using tag-specific antibodies. Purified GST- $\alpha 3$  and  $\beta 3$ -FLAG proteins were loaded as the input lane.

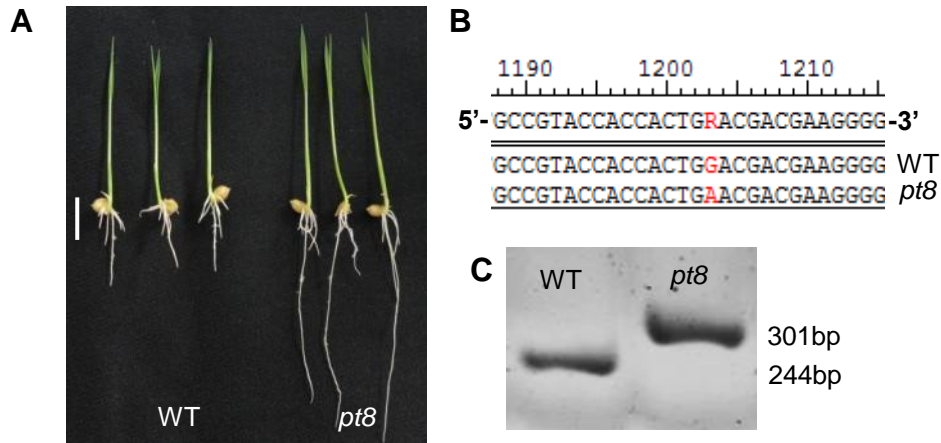

**Supplemental Figure 7. Isolation of *pt8* mutants in Nipponbare background.**

(A) Tolerance of *pt8* mutant to arsenate (As; 30  $\mu$ M). Seedlings of the wild-type (cv. Nipponbare) and *pt8* mutant after growth in solution containing 30 $\mu$ M As for 5 d. Bar = 1 cm. (B) Representative sequences of mutant allele identified from a single plant of the *pt8* mutant. (C) PCR analysis using a pair of dCAPS primers to confirm the point mutation in *pt8*. The PCR products of *PT8* from the wild type and *pt8* from the mutant were digested with *Sall*. dCAPS primers are listed in Supplemental Table 1.

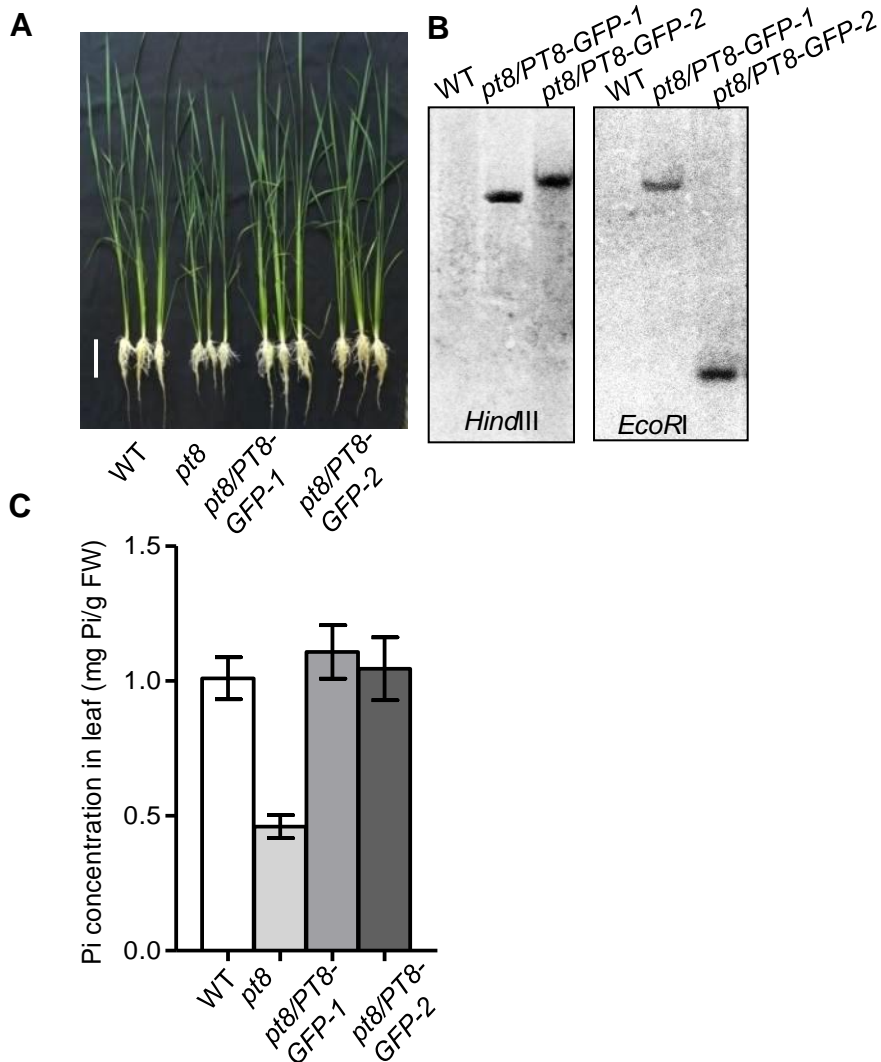

**Supplemental Figure 8. Functional PT8-GFP rescued *pt8* mutant.**

(A) Phenotype of 30-d-old plants of wild type, *pt8* mutant, and two independent transgenic lines of the *pt8* mutant complemented with *PT8-GFP* construct (*PT8p-PT8-GFP*) grown in solution culture with 200  $\mu$ M Pi. Bar = 5 cm. (B) DNA gel blot analysis of the two independent transgenic lines. (C) Cellular Pi concentration in leaves of 21-d-old wild type, *pt8* mutant, and the transgenic lines of the *pt8* mutant complemented with *PT8-GFP* grown in solution culture supplied with 200  $\mu$ M Pi. Error bars represent SD ( $n = 3$ ).



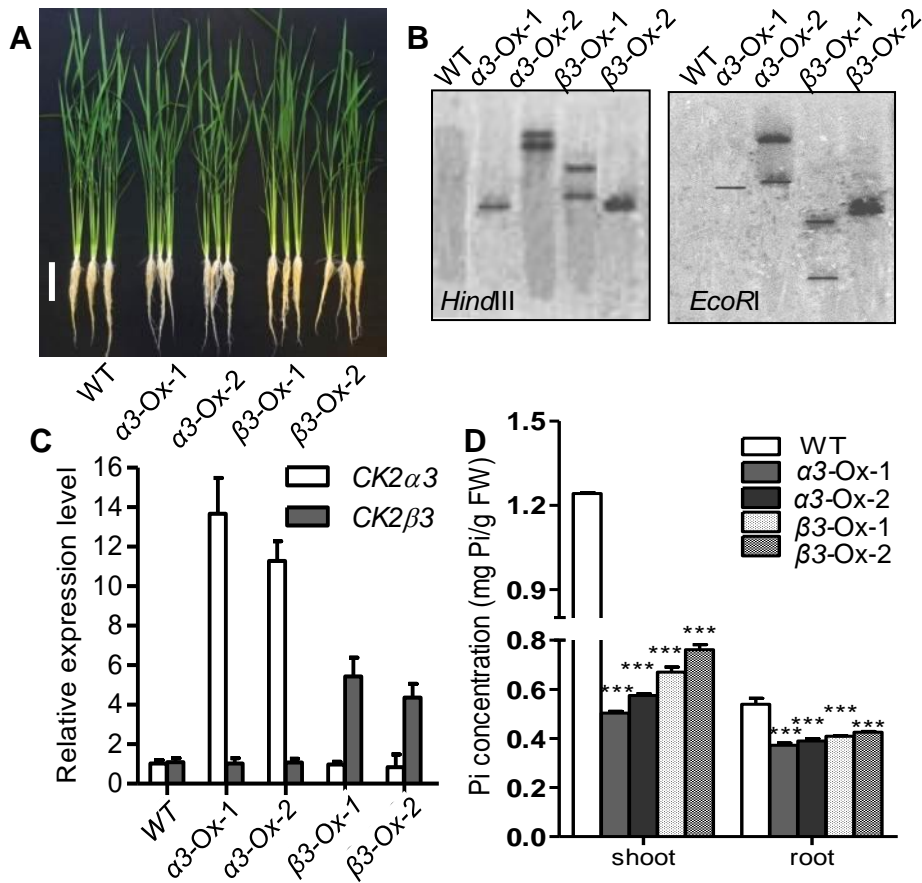

**Supplemental Figure 9. Phenotype and Pi concentration of transgenic plants overexpressing *CK2 $\alpha$ 3*/*CK2 $\beta$ 3*.** (A) Phenotypes of the wild type (WT; cv. Nipponbare) and two independent lines displaying 35S promoter driven overexpression of *CK2 $\alpha$ 3* ( $\alpha 3\text{-Ox-1/2}$ ) or *CK2 $\beta$ 3* ( $\beta 3\text{-Ox-1/2}$ ). The plants were grown for 30 d in a high Pi regime (200  $\mu\text{M}$  Pi). Bars = 10 cm. (B) DNA gel blot analysis of the two independent transgenic lines. (C) Relative expression of *CK2 $\alpha$ 3*/*CK2 $\beta$ 3* in the transgenic plants. (D) Cellular Pi concentration of shoots and roots of the plants shown in (A). Error bars represent SD ( $n = 3$  for C and D). Data significantly different between WT and the corresponding plants are indicated (\*\*  $P < 0.05$ ; \*\*\*  $P < 0.001$ ; Student's  $t$  test). FW, Fresh weight.

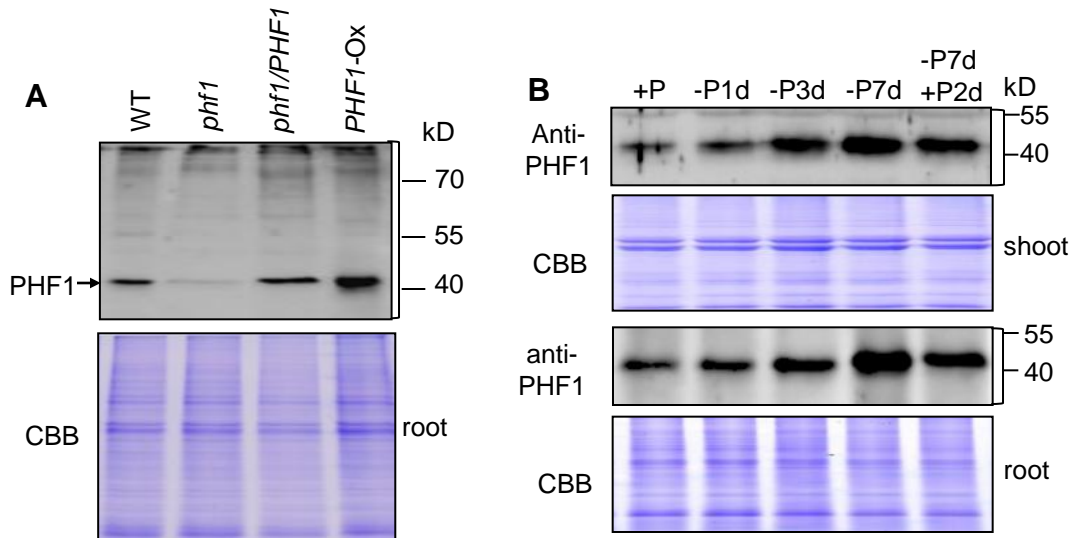

**Supplemental Figure 10. Specificity of the PHF1 polyclonal antibody.**

(A) Immunoblotting of membrane protein from roots of the wild type (WT; cv. Nipponbare), *phf1* mutant, one transgenic line of *phf1* complemented with a fragment encompassing 3702 bp before the ATG of *PHF1* and the *PHF1* ORF (*phf1/PHF1*), as well as transgenic plants overexpressing *PHF1* (*PHF1-Ox*). A specific band of the expected size of PHF1 (43 kDa) was detected with the expected intensity according to the genetic constitution of the plants corresponding to each lane. (B) The PHF1 level in shoots (top panel) and roots (bottom panel) of 10-d-old seedlings grown under -P conditions for an additional 7 d. The immunoblots were probed with anti-PHF1. Equal amounts of microsomal protein (10  $\mu$ g) were used for immunoblotting. Staining by Coomassie blue indicates the similar amounts of proteins loaded.

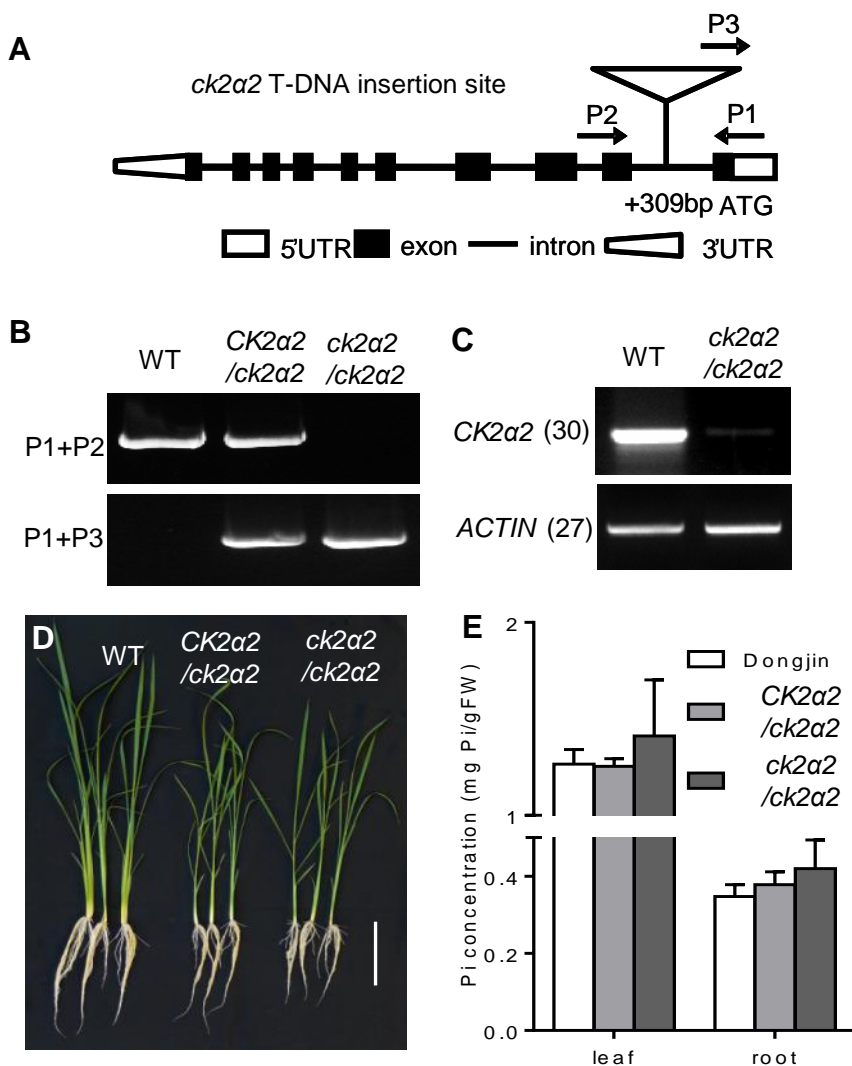

**Supplemental Figure 11. Phenotype and Pi content analysis of  $\alpha 2$  T-DNA insertional mutant.** (A) Diagrammatic representation of the T-DNA insertion site at the first intron of  $\alpha 2$  at 309 bp after the ATG determined by sequencing and PCR analysis (B). (C) RT-PCR analysis of  $\alpha 2$  transcript in WT and homozygous (*ck2a2/ck2a2*) mutant plants. (D) Phenotype of the wild type (WT, Dongjin), heterozygous (*CK2a2/ck2a2*) and homozygous (*ck2a2/ck2a2*) mutant plants. The plants were grown in solution culture (200  $\mu$ M Pi) for 30 d. Bar = 10 cm. (E) Pi concentration of plants shown in (D). Error bars represent SD ( $n = 3$ ). Primers are listed in the Supplemental Table 1.

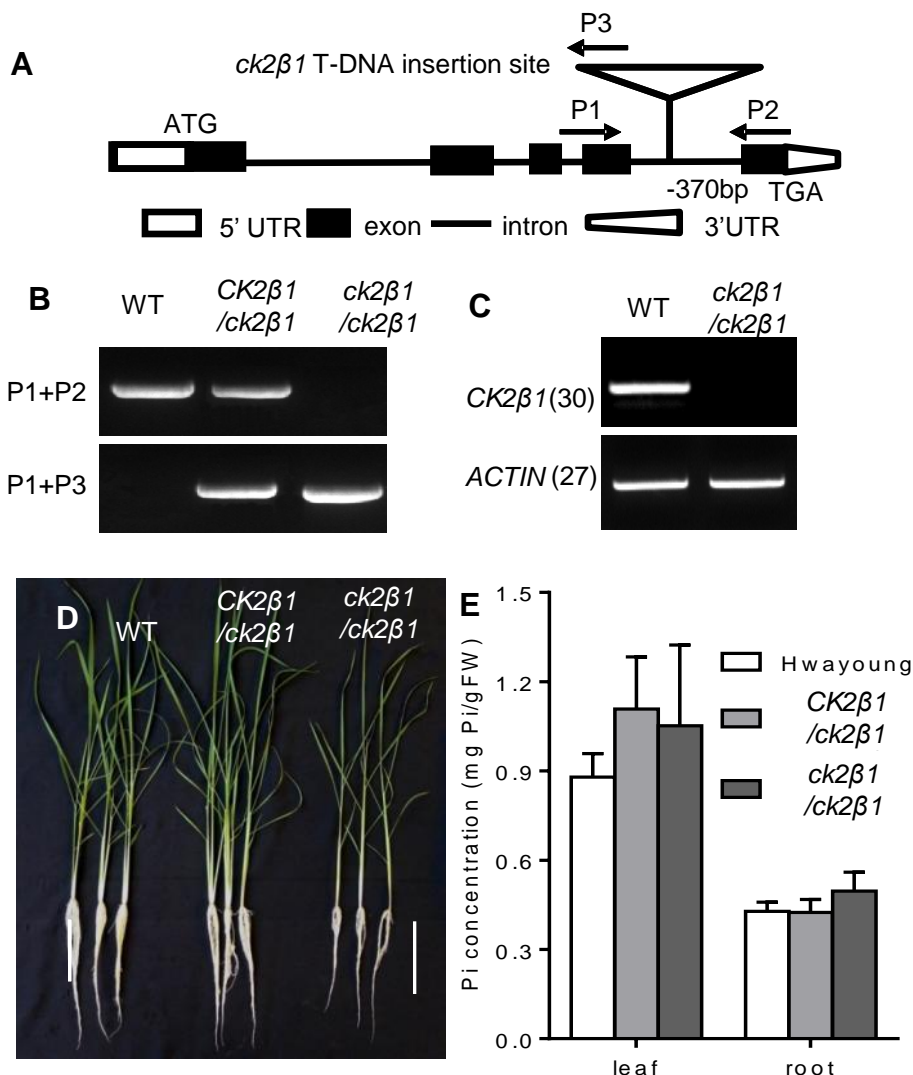

**Supplemental Figure 12. Phenotype and Pi analysis of  $\beta 1$  T-DNA insertional mutant.** (A) Diagrammatic representation of the T-DNA insertion site at 370 bp upstream of the last exon of  $\beta 1$  determined by sequencing and PCR analysis (B). (C) RT-PCR analysis of  $\beta 1$  transcript in WT and homozygous (*ck2 $\beta$ 1/ck2 $\beta$ 1*) mutant plants. (D) Phenotype of the wild-type (WT, Hwayoung), heterozygous (*CK2 $\beta$ 1/ck2 $\beta$ 1*) and homozygous (*ck2 $\beta$ 1/ck2 $\beta$ 1*) mutant plants. The plants were grown in solution culture (200  $\mu$ M Pi) for 30 d. Bar = 10 cm. (E) Pi concentration of plants shown in (D). Error bars represent SD ( $n = 3$ ). Primers are listed in the Supplemental Table 1.

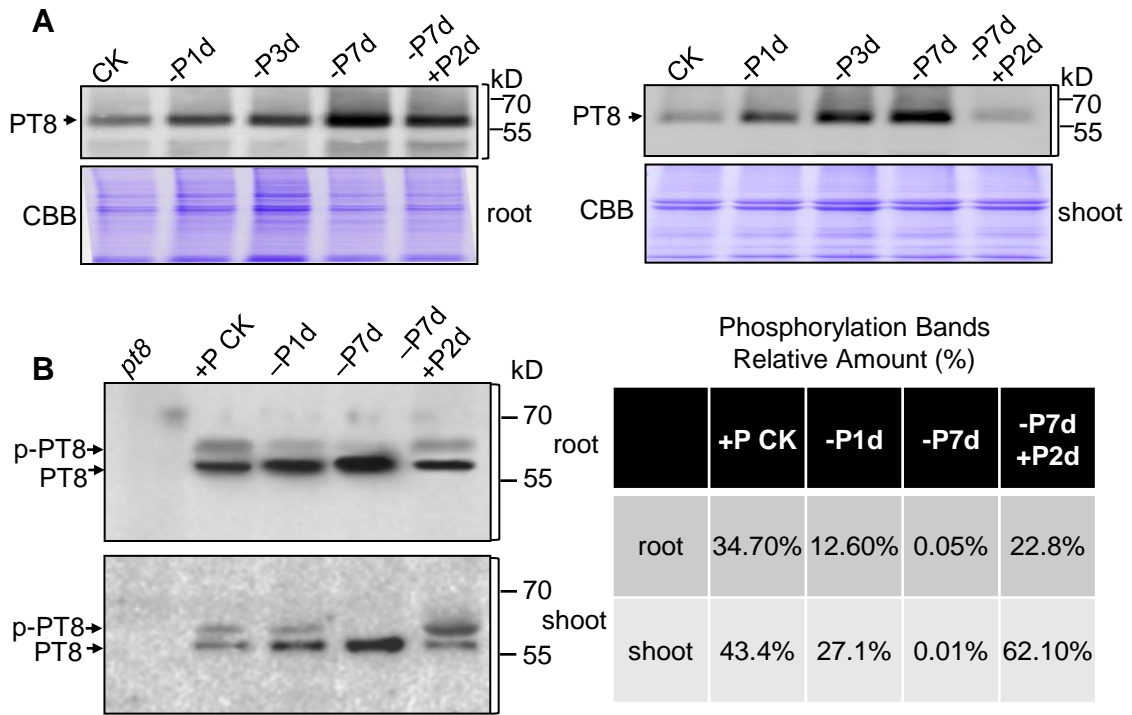

**Supplemental Figure 13. PT8 protein accumulation and phosphorylation levels differ in roots and shoots.** (A) PT8 protein level in plasma membrane-enriched fractions of shoot and root. Proteins were detected by immunoblotting using an anti-PT8 antibody in roots (left panel) and shoots (right panel) of transgenic plants grown for 10 d and then subjected to Pi starvation for different periods as indicated, or to Pi re-supply after Pi starvation. Equal amounts of plasma membrane protein (10  $\mu$ g) were used for immunoblotting. Staining by Coomassie blue indicates the similar amounts of proteins loaded. (B) Total membrane PT8 protein level and phosphorylation in roots and shoots. The total membrane protein was extracted from plant samples as in (A) and equal amounts of total membrane protein (10  $\mu$ g) were used for immunoblotting. The immunoblots were developed with anti-PT8 in PhosTag SDS-PAGE. The percentage of phosphorylated PT8 versus the total quantity of PT8 protein was quantified (right panel).

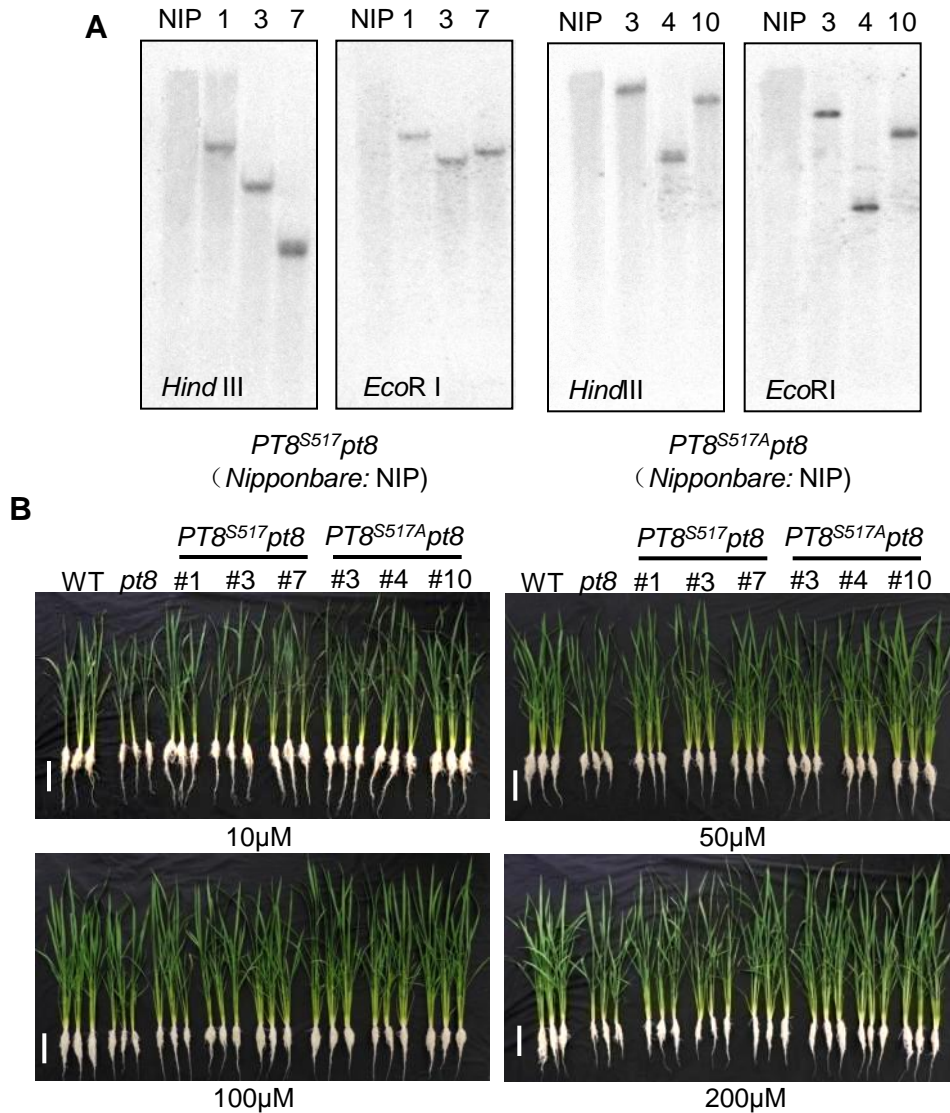

**Supplemental Figure 14. DNA gel blot analysis and plant phenotype of independent transgenic lines of the *pt8* mutant transformed with *PT8<sup>S517</sup>* and *PT8<sup>S517A</sup>* expressing constructs.** (A) DNA gel blot analysis of three independent transgenic lines for each construct. (B) Phenotype of the wild type (WT), *pt8* mutants and transgenic *pt8* mutant plants expressing *PT8* (*PT8<sup>S517</sup>*) or the non-phosphorylatable *PT8<sup>S517A</sup>* mutant from the *PT8* promoter. Dry weight and Pi content of shoots and roots of NIP, *pt8* and transgenic plants grown under different Pi regimens are shown in Figure 7. Bar = 10 cm.

**Supplementary Table 1 Primers used in this study.**

| Primer                  | Sequence(5'-3')                                 |
|-------------------------|-------------------------------------------------|
| PT2-pBT3-STE-U          | ATTAACAAGGCCATTACGGCCATGGCGGGATCGCAGCTCAA       |
| PT2-pBT3-STE-L          | AACTGATTGGCCGAGGCGGCCCCCGCTTGGGCGATCGCTTCTT     |
| PT8-pBT3-STE-U          | ATTAACAAGGCCATTACGGCCATGGCGCGGCAGGAGCAGCAGCAG   |
| PT8-pBT3-STE-L          | AACTGATTGGCCGAGGCGGCCCCCGCTTGC GGCCGCACG        |
| CK2 $\alpha$ 2-pPR3-N-U | ATTAACAAGGCCATTACGGCCATGTCCAAGGCCAGGGTCTACAC    |
| CK2 $\alpha$ 2-pPR3-N-L | AACTGATTGGCCGAGGCGGCCCTATTGTGCACGAGGCCTACTGTTC  |
| CK2 $\alpha$ 3-pPR3-N-U | ATTAACAAGGCCATTACGGCCATGTGACGGCCCGCGTCTA        |
| CK2 $\alpha$ 3-pPR3-N-L | AACTGATTGGCCGAGGCGGCCCTACGTTCTCATTCTGCAGTCTTCT  |
| CK2 $\beta$ 1-pPR3-N-U  | ATTAACAAGGCCATTACGGCCATGAGCGGCGCGTACAGG         |
| CK2 $\beta$ 1-pPR3-N-L  | AACTGATTGGCCGAGGCGGCCCTCATGACTGCTTGTGAAGTTTGAAG |
| CK2 $\beta$ 3-pPR3-N-U  | ATTAACAAGGCCATTACGGCCATGTACAAGCAGGGGGGAGGA      |
| CK2 $\beta$ 3-pPR3-N-L  | AACTGATTGGCCGAGGCGGCCCTCATGGCTTGTGGAGCTTGAAT    |
| PT2-GFP-U               | GCTCTAGAATGGCGGGATCGCAGCTCAACGTTT               |
| PT2-GFP -L              | GCTCTAGACGCTTGGGCGATCGCTTCTTGG                  |
| PT8-GFP-U               | CCCTCTAGAATGGCGCGGCAGGAGCAGCAG                  |
| PT8-GFP -L              | CCCCTCGAGCGCCGCTTGC GGCCGCACG                   |
| CK2 $\alpha$ 2-HA-U     | CCCTTAATTAACATGTCCAAGGCCAGGGT                   |
| CK2 $\alpha$ 2-HA-L     | TTGGCGCGCCCTTGTGCACGAGGCCTACT                   |
| CK2 $\alpha$ 3-Flag-U   | GCTCTAGAATGTGACGGCCCGCGT                        |
| CK2 $\alpha$ 3-Flag-L   | GCTCTAGACGTTCTCATTCTGCAGTCTTCTGCT               |
| CK2 $\beta$ 1-HA-U      | CCCTTAATTAACATGAGCGGCGCGTACA                    |
| CK2 $\beta$ 1-HA-L      | TTGGCGCGCCCTGACTGCTTGTGAAGTTTGA                 |
| CK2 $\beta$ 3-pC-TAPa-U | GAAGATCTATGTACAAGCAGGGGGGAGG                    |
| CK2 $\beta$ 3-pC-TAPa-L | GAAGATCTTCATGGCTTGTGGAGCTTGA                    |
| PT2-CT-Y3H-U            | AGGAATCCCGGAGTCCAAGGGCTTGTGCG                   |
| PT2-CT-Y3H-L            | CGAGGATCCTCACGCTTGGGCGATCGCTTCTTG               |
| PT8-CT-Y3H-U            | GGAATCCCGGAGTCGAAGGGGAAGT                       |
| PT8-CT-Y3H-L            | GGAATTCCTACGCCGTCTGCGGCC                        |
| CK2 $\beta$ 3-Y3H-U     | GAAGATCTATGTACAAGCAGGGGGGAGG                    |
| CK2 $\beta$ 3-Y3H-L     | GAAGATCTTCATGGCTTGTGGAGCTTGA                    |
| PT8-CT-GFP-U            | GGAATTCATGCCGAGTCGAAGGGGAAGT                    |
| PT8-CT-GFP-L            | GGAATTCCTACGCCGTCTGCGGCC                        |
| CK2 $\alpha$ 3-GFP-U    | GCTCTAGAATGTGACGGCCCGCGT                        |
| CK2 $\alpha$ 3-GFP-L    | GCTCTAGACGTTCTCATTCTGCAGTCTTCTGCT               |
| CK2 $\beta$ 3-GFP-U     | GCTCTAGAATGTACAAGCAGGGGGGA                      |
| CK2 $\beta$ 3-GFP -L    | GCTCTAGATGGCTTGTGGAGCTTGAATCCAAAT               |
| GST-CK2 $\alpha$ 3-U    | CGGGATCCATGTGACGGCCCGCGT                        |
| GST-CK2 $\alpha$ 3-L    | CGGGATCCTTACGTTCTCATTCTGCAGTCTTCT               |
| GST-CK2 $\beta$ 3-U     | CGGGATCCATGTACAAGCAGGGGGGAGGAGGGG               |

---

|                                     |                                                          |
|-------------------------------------|----------------------------------------------------------|
| GST-CK2β3-L                         | ACGCGTCGACTCATGGCTTGTGGAGCTTGAATCCA                      |
| GST-PT8-CT-U                        | AAAGAATTCCCGGAGTCGAAGGGGAAGTCGCT                         |
| GST-PT8-CT-L                        | AAAGTCGACCTACGCCGTCTGCGGCCGC                             |
| GST-PT8-CT <sup>S512A</sup> -U      | GGAATTCCCGGAGTCGAAGGGGAAGGCCCTGGAGGAG                    |
| GST-PT8-CT <sup>S512A</sup> -L      | GCGTCGACCTACGCCGTCTGCGGCCGCACGGC                         |
| GST-PT8-CT <sup>S517A</sup> -U      | GGAATTCCCGGAGTCGAAGGGGAAGTCGCTGGAGGAGATGGCCGGCGAG<br>GCG |
| GST-PT8-CT <sup>S517A</sup> -L      | GCGTCGACCTACGCCGTCTGCGGCCGCACGGCGGCCACCG                 |
| GST-PT8-CT <sup>S512A/517A</sup> -U | GGAATTCCCGGAGTCGAAGGGGAAGGCCCTGGAGGAGATGGCCGGCGAG<br>GCG |
| GST-PT8-CT <sup>S512A/517A</sup> -L | GCGTCGACCTACGCCGTCTGCGGCCGCACGGCGGCCACCGC                |
| 35S-CK2β3-FLAG-U                    | GCTCTAGAATGTACAAGCAGGGGGGA                               |
| 35S-CK2β3-FLAG-L                    | GCTCTAGATGGCTTGTGGAGCTTGAATCCAAAT                        |
| 35S-CK2α2-U                         | GCTCTAGAATGTCCAAGGCCAGGGTCTACACCG                        |
| 35S-CK2α2-L                         | GCTCTAGATTGTGCACGAGGCCACTGTTCTCC                         |
| 35S-CK2α3-U                         | GCTCTAGAATGTCGACGGCCCGCT                                 |
| 35S-CK2α3-L                         | GCTCTAGACGTTCTCATTCTGCAGTCTTCTGCT                        |
| 35S-CK2β1-U                         | GCTCTAGAATGAGCGGCGCGTACA                                 |
| 35S-CK2β1-L                         | GCTCTAGATGACTGCTTGTGAAGTTTGAAGCCA                        |
| 35S-CK2β3-U                         | GCTCTAGAATGTACAAGCAGGGGGGA                               |
| 35S-CK2β3-L                         | GCTCTAGATGGCTTGTGGAGCTTGAATCCAAAT                        |
| PT8 promoter-U                      | ACGCGTCGACTGTCTGCTCTCCCGTGTCTTCGTT                       |
| PT8 promoter-L                      | GCTCTAGACGCCGTCTGCGGCCGCAC                               |
| PHF1-pBT3-N-U                       | ATTAACAAGGCCATTACGGCCATGGCAGGCGGGAGGT                    |
| PHF1-pBT3-N-L                       | AACTGATTGGCCGAGGCGGCCTCACCAGGGTTCTGGTCCTCAGG             |
| PT8-pPR3-STE-U                      | ATTAACAAGGCCATTACGGCCTTGC GCGGCAGGAGCAGCAGCAG            |
| PT8-pPR3-STE-L                      | AACTGATTGGCCGAGGCGGCCCCCGCCGTCTGCGGCCGCACG               |
| PT8 <sup>S517A</sup> -pPR3-STE-P1   | ATTAACAAGGCCATTACGGCCTTGC GCGGCAGGAGCAGCAGCAGCA          |
| PT8 <sup>S517A</sup> -pPR3-STE-P2   | CTCCGCCTCGCCCGCCATCTCTCTCC                               |
| PT8 <sup>S517A</sup> -pPR3-STE-P3   | GGAGGAGATGGCGGGCGAGGCGGAG                                |
| PT8 <sup>S517A</sup> -pPR3-STE-P4   | AACTGATTGGCCGAGGCGGCCCCCGCCGTCTGCGGCCGCACG               |
| PT8 <sup>S517D</sup> -pPR3-STE-P1   | ATTAACAAGGCCATTACGGCCTTGC GCGGCAGGAGCAGCAGCAGCA          |
| PT8 <sup>S517D</sup> -pPR3-STE-P2   | CTCCGCCTCGCCGTCCATCTCTCTCC                               |
| PT8 <sup>S517D</sup> -pPR3-STE-P3   | GGAGGAGATGGACGGCGAGGCGGAG                                |
| PT8 <sup>S517D</sup> -pPR3-STE-P4   | AACTGATTGGCCGAGGCGGCCCCCGCCGTCTGCGGCCGCACG               |
| PT8-GFP-U                           | CCCTCTAGAAT GGCGCGGCAGGAGCAGCAG                          |
| PT8-GFP-L                           | CCCCTCGAGCGCCGTCTGCGGCCGCACG                             |
| <i>pt8</i> dCAPS-U                  | GGCCTCGCCGTGCCGTACCACCAGTC                               |
| <i>pt8</i> dCAPS-L                  | CGGCGAGCACGAACAGCGAGTT                                   |
| ck2α2 T-DNA-P1                      | TTGCATCACAATCAATCAGGA                                    |
| ck2α2 T-DNA-P2                      | AATTGATGTTTTGGACAATGG                                    |
| ck2α2 T-DNA-P3                      | ACGTCCGCAATGTGTTATTAA                                    |
| ck2β1 T-DNA-P1                      | AAGGAGCCATTTCCAATAACC                                    |
| ck2β1 T-DNA-P2                      | CCAAAGTACGCTCCGTCAAT                                     |

---



---

|                |                         |
|----------------|-------------------------|
| ck2β1 T-DNA-P3 | AACGCTGATCAATTCCACAG    |
| CK2α2-RT-U     | GGGCTGCGGAGAACAGTAGG    |
| CK2α2-RT-L     | AATCCACGTTTGCGGTTAAG    |
| CK2β1-RT-U     | AGCGTACTTTGGGACAACAT    |
| CK2β1-RT-L     | GCAATTACAGCGAGATTCA     |
| ACTIN-RT-U     | CAACACCCCTGCTATGTACG    |
| ACTIN-RT-L     | CATCACCAGAGTCCAACACAA   |
| CK2α3-RNAi-U   | GCATCATTAATAATCTCAAGCCT |
| CK2α3-RNAi-L   | AATGACAGTAATCCAATGCCTT  |
| CK2β3-RNAi-U   | TATGGGCTGATTCATGCACGAT  |
| CK2β3-RNAi-L   | AACAGGTGCGGGAATGT       |
| CK2α3-QRT-U    | AAAATAGGCATCTTGTCTCTCCA |
| CK2α3-QRT-L    | AAAGTAGGGATGCGCCATAG    |
| CK2β3-QRT-U    | GGGAGTCTGAATCTGATAGTGAA |
| CK2β3-QRT-L    | CTGCTAAGCCCACAGAGGT     |
| ACTIN-QRT-U    | CAACACCCCTGCTATGTACG    |
| ACTIN-QRT-L    | CATCACCAGAGTCCAACACAA   |

---
